# Supplementary material for: Joint Effect of CFH and ARMS2/HTRA1 Polymorphisms on Neovascular Age-Related Macular Degeneration in Chinese Population
Source: Hindawi journal article supplement (doi:10.1155/2015/821918), 2015-01-01
Supplement: f1 [file 821918.f1.pdf]

# Supporting Information

**Table S1. Genes and environmental risk factors to explore the interactions in GMDR.**

| Gene/Environmental factor | SNP ID                                                                                                                      |
|---------------------------|-----------------------------------------------------------------------------------------------------------------------------|
| CFH                       | [rs1061170 <sup>A</sup> ,rs1329424 <sup>B</sup> ,rs10801555 <sup>B</sup> ,rs6695321 <sup>B</sup> ,rs10733086 <sup>B</sup> ] |
|                           | [rs800292 <sup>A</sup> ,rs551397 <sup>B</sup> ]                                                                             |
|                           | [rs2274700 <sup>A</sup> ,rs3753396 <sup>B</sup> ,rs1410996 <sup>B</sup> ]                                                   |
|                           | [rs10737680 <sup>A</sup> ,rs12124794 <sup>B</sup> ]                                                                         |
|                           | rs7524776                                                                                                                   |
|                           | rs7542235                                                                                                                   |
|                           | rs380390                                                                                                                    |
|                           | rs3753394                                                                                                                   |
| C3                        | rs11569562                                                                                                                  |
|                           | rs7257062                                                                                                                   |
|                           | rs2250656                                                                                                                   |
|                           | rs408290                                                                                                                    |
|                           | rs2230205                                                                                                                   |
|                           | rs8112351                                                                                                                   |
| ARMS2/HTRA1               | [rs3793917 <sup>A</sup> ,rs10490924 <sup>B</sup> ,rs11200638 <sup>B</sup> ]                                                 |
|                           | rs2736912                                                                                                                   |
| CETP                      | rs289744                                                                                                                    |
|                           | rs9939224                                                                                                                   |
|                           | rs2303789                                                                                                                   |
|                           | rs1532625                                                                                                                   |
|                           | rs17231506                                                                                                                  |
| HERPUD1                   | rs2133783                                                                                                                   |
|                           | rs2217332                                                                                                                   |
| SERPING1                  | rs1005510                                                                                                                   |
|                           | rs2511989                                                                                                                   |
| VEGF                      | rs833069                                                                                                                    |
|                           | rs3025039                                                                                                                   |
| LPL                       | rs12678919                                                                                                                  |
| LIPC                      | rs10468017                                                                                                                  |
| TIMP3                     | rs9621532                                                                                                                   |
| Cigarette smoking         | -                                                                                                                           |

[ ] refers to the set with LD. Only one SNP was selected within each set.

<sup>A</sup>SNP selected to represent the SNP set it belonged to.

<sup>B</sup>Risk factors not loaded as initial markers for GMDR.

**Table S2.Genotype frequency and associations of 43 SNPs with nAMD.**

| Gene | SNP ID     | MAF     | Genotype | Cases (%) | Controls (%) | P <sup>A</sup> | OR(95%CI) <sup>B</sup> | P <sup>B</sup> |
|------|------------|---------|----------|-----------|--------------|----------------|------------------------|----------------|
| CFH  | rs551397   | 0.36(A) | AA       | 46(10.3)  | 75(16.4)     | 2.87E-5        | 1.00                   |                |
|      |            |         | AG       | 183(40.9) | 224(49.1)    |                | 1.23(0.80-1.89)        | 0.341          |
|      |            |         | GG       | 218(48.8) | 157(34.4)    |                | 2.21(1.43-3.41)        | 3.41E-4        |
|      | rs800292   | 0.36(T) | TT       | 47(10.6)  | 76(16.7)     | 2.02E-5        | 1.00                   |                |
|      |            |         | TC       | 176(39.8) | 221(48.6)    |                | 1.20(0.78-1.84)        | 0.408          |
|      |            |         | CC       | 219(49.5) | 158(34.7)    |                | 2.20(1.43-3.38)        | 3.39E-4        |
|      | rs1061170  | 0.09(C) | TT       | 331(78.8) | 395(88.8)    | 5.39E-5        | 1.00                   |                |
|      |            |         | TC       | 81(19.3)  | 49(11.0)     |                | 2.01(1.36-2.99)        | 0.001          |
|      |            |         | CC       | 8(1.9)    | 1(0.2)       |                | 8.52(1.05-69.08)       | 0.045          |
|      | rs1329424  | 0.08(A) | CC       | 365(79.5) | 412(88.8)    | 9.95E-5        | 1.00                   |                |
|      |            |         | CA       | 86(18.7)  | 51(11.0)     |                | 1.88(1.28-2.76)        | 0.001          |
|      |            |         | AA       | 8(1.7)    | 1(0.2)       |                | 7.99(0.99-64.75)       | 0.052          |
|      | rs3753396  | 0.49(A) | GG       | 134(29.1) | 105(22.6)    | 0.077          |                        |                |
|      |            |         | GA       | 222(48.2) | 239(51.5)    |                | NS <sup>C</sup>        |                |
|      |            |         | AA       | 105(22.8) | 120(25.9)    |                | NS                     |                |
|      | rs6695321  | 0.15(A) | GG       | 321(70.1) | 343(73.9)    | 0.392          |                        |                |
|      |            |         | GA       | 126(27.5) | 113(24.4)    |                | NS                     |                |
|      |            |         | AA       | 11(2.4)   | 8(1.7)       |                | NS                     |                |
|      | rs7524776  | 0.05(C) | TT       | 417(90.3) | 416(89.8)    | 0.554          |                        |                |
|      |            |         | TC       | 42(9.1)   | 46(9.9)      |                | NS                     |                |
|      |            |         | CC       | 3(0.6)    | 1(0.2)       |                | NS                     |                |
|      | rs7542235  | 0.05(G) | AA       | 430(93.5) | 403(87.0)    | 0.001          | 1.00                   |                |
|      |            |         | AG       | 30(6.5)   | 58(12.5)     |                | 0.51(0.32-0.81)        | 0.005          |
|      |            |         | GG       | 0(0.0)    | 2(0.4)       |                | NS                     |                |
|      | rs10733086 | 0.10(A) | TT       | 349(75.5) | 397(85.7)    | 7.23E-5        | 1.00                   |                |
|      |            |         | TA       | 105(22.7) | 65(14.0)     |                | 1.80(1.27-2.56)        | 0.001          |
|      |            |         | AA       | 8(1.7)    | 1(0.2)       |                | 8.06(0.99-65.35)       | 0.051          |
|      | rs10801555 | 0.08(A) | GG       | 363(80.0) | 408(88.7)    | 2.30E-4        | 1.00                   |                |
|      |            |         | GA       | 83(18.3)  | 51(11.1)     |                | 1.83(1.24-2.69)        | 0.002          |
|      |            |         | AA       | 8(1.8)    | 1(0.2)       |                | 7.96(0.98-64.53)       | 0.052          |
|      | rs380390   | 0.09(C) | GG       | 348(78.2) | 401(89.7)    | 3.23E-6        | 1.00                   |                |
|      |            |         | GC       | 89(20.0)  | 45(10.1)     |                | 2.22(1.50-3.30)        | 7.91E-5        |
|      |            |         | CC       | 8(1.8)    | 1(0.2)       |                | 8.67(1.07-70.18)       | 0.043          |
|      | rs1410996  | 0.39(T) | TT       | 54(11.7)  | 92(19.8)     | 2.55E-5        | 1.00                   |                |
|      |            |         | TC       | 199(43.3) | 224(48.3)    |                | 1.30(0.87-1.94)        | 0.201          |
|      |            |         | CC       | 207(45.0) | 148(31.9)    |                | 2.23(1.48-3.35)        | 1.22E-4        |
|      | rs2274700  | 0.39(T) | TT       | 51(11.6)  | 88(20.0)     | 5.42E-6        | 1.00                   |                |
|      |            |         | TC       | 188(42.6) | 216(49.0)    |                | 1.30(0.87-1.96)        | 0.203          |
|      |            |         | CC       | 202(45.8) | 137(31.1)    |                | 2.39(1.57-3.63)        | 4.71E-5        |
|      | rs3753394  | 0.45(C) | CC       | 89(19.4)  | 102(22.0)    | 0.127          |                        |                |
|      |            |         | CT       | 212(46.2) | 230(49.7)    |                | NS                     |                |
|      |            |         | TT       | 158(34.4) | 131(28.3)    |                | NS                     |                |
|      | rs10737680 | 0.39(C) | CC       | 54(11.7)  | 92(19.7)     | 8.25E-5        | 1.00                   |                |
|      |            |         | CA       | 201(43.6) | 223(47.6)    |                | 1.31(0.88-1.95)        | 0.189          |

|       |            |          |    |           |           |          |                  |          |
|-------|------------|----------|----|-----------|-----------|----------|------------------|----------|
|       | rs12124794 | 0.32(T)  | AA | 206(44.7) | 153(32.7) | 0.006    | 2.162(1.44-3.25) | 2.15E-4  |
|       |            |          | TT | 39(8.6)   | 56(12.2)  |          | 1.00             |          |
|       |            |          | TA | 184(40.4) | 216(47.0) |          | 1.042(0.65-1.67) | 0.864    |
|       |            |          | AA | 233(51.1) | 188(40.9) |          | 1.639(1.03-2.61) | 0.038    |
| C3    | rs1047286  | 0.002(T) | CC | 455(99.6) | 455(99.8) | 1.000    |                  |          |
|       |            |          | CT | 2(0.4)    | 1(0.2)    |          | NS               |          |
|       | rs11569562 | 0.46(T)  | TT | 87(18.9)  | 101(21.8) | 0.284    |                  |          |
|       |            |          | TC | 250(54.3) | 228(49.2) |          | NS               |          |
|       |            |          | CC | 123(26.7) | 134(28.9) |          | NS               |          |
|       | rs2230199  | 0.003(G) | CC | 458(99.1) | 463(99.6) | 0.450    |                  |          |
|       |            |          | CG | 4(0.9)    | 2(0.4)    |          | NS               |          |
|       | rs2250656  | 0.22(G)  | AA | 283(62.6) | 273(59.6) | 0.649    |                  |          |
|       |            |          | AG | 150(33.2) | 164(35.8) |          | NS               |          |
|       |            |          | GG | 19(4.2)   | 21(4.6)   |          | NS               |          |
|       | rs7257062  | 0.26(C)  | TT | 251(54.4) | 250(53.9) | 0.359    |                  |          |
|       |            |          | TC | 184(39.9) | 177(38.1) |          | NS               |          |
|       |            |          | CC | 26(5.6)   | 37(8.0)   |          | NS               |          |
|       | rs408290   | 0.16(G)  | CC | 333(72.5) | 323(69.5) | 0.516    |                  |          |
|       |            |          | CG | 115(25.1) | 127(27.3) |          | NS               |          |
|       |            |          | GG | 11(2.4)   | 15(3.2)   |          | NS               |          |
|       | rs2230205  | 0.47(A)  | GG | 138(29.9) | 137(29.5) | 0.806    |                  |          |
|       |            |          | GA | 210(45.6) | 221(47.5) |          | NS               |          |
|       |            |          | AA | 113(24.5) | 107(23.0) |          | NS               |          |
|       | rs8112351  | 0.09(T)  | CC | 385(83.9) | 383(83.1) | 0.946    |                  |          |
|       |            |          | CT | 70(15.3)  | 74(16.1)  |          | NS               |          |
|       |            |          | TT | 4(0.9)    | 4(0.9)    |          | NS               |          |
| ARMS2 | rs10490924 | 0.44(G)  | GG | 66(14.3)  | 147(31.5) | 1.10E-20 | 1.00             |          |
|       |            |          | GT | 166(36.1) | 223(47.8) |          | 1.63(1.14-2.34)  | 0.008    |
|       |            |          | TT | 228(49.6) | 97(20.8)  |          | 4.85(3.31-7.12)  | 6.82E-16 |
|       | rs2736912  | 0.09(T)  | TT | 3(0.7)    | 11(2.4)   | 3.36E-4  | 1.00             |          |
|       |            |          | TC | 55(12.0)  | 91(19.8)  |          | 2.16(0.56-8.34)  | 0.264    |
|       |            |          | CC | 402(87.4) | 358(77.8) |          | 4.30(1.15-16.01) | 0.030    |
| HTRA1 | rs11200638 | 0.43(G)  | GG | 68(14.7)  | 140(29.9) | 1.13E-18 | 1.00             |          |
|       |            |          | GA | 163(35.3) | 224(47.9) |          | 1.49(1.04-2.14)  | 0.031    |
|       |            |          | AA | 231(50.0) | 104(22.2) |          | 4.32(2.96-6.31)  | 4.19E-14 |
|       | rs3793917  | 0.43(G)  | GG | 63(13.8)  | 141(31.1) | 3.08E-22 | 1.00             |          |
|       |            |          | GC | 161(35.4) | 221(48.7) |          | 1.60(1.11-2.31)  | 0.012    |
|       |            |          | CC | 231(50.8) | 92(20.3)  |          | 5.23(3.53-7.74)  | 1.36E-16 |
| CETP  | rs173539   | 0.04(T)  | CC | 400(94.6) | 397(95.7) | 0.732    |                  |          |
|       |            |          | CT | 6(1.4)    | 4(1.0)    |          | NS               |          |
|       |            |          | TT | 17(4.0)   | 14(3.4)   |          | NS               |          |
|       | rs389744   | 0.30(C)  | AA | 225(50.2) | 211(47.8) | 0.466    |                  |          |
|       |            |          | AC | 179(40.0) | 193(43.8) |          | NS               |          |
|       |            |          | CC | 44(9.8)   | 37(8.4)   |          | NS               |          |
|       | rs2303789  | 0.16(G)  | TT | 338(73.3) | 320(68.8) | 0.313    |                  |          |
|       |            |          | TG | 112(24.3) | 131(28.2) |          | NS               |          |
|       |            |          | GG | 11(2.4)   | 14(3.0)   |          | NS               |          |

|          |            |         |    |           |           |       |    |
|----------|------------|---------|----|-----------|-----------|-------|----|
|          | rs9939224  | 0.11(T) | GG | 367(79.6) | 374(80.8) | 0.678 |    |
|          |            |         | GT | 86(18.7)  | 84(18.1)  |       | NS |
|          |            |         | TT | 8(1.7)    | 5(1.1)    |       | NS |
|          | rs1532625  | 0.29(A) | AA | 39(8.5)   | 45(9.7)   | 0.305 |    |
|          |            |         | GA | 193(41.9) | 172(37.0) |       | NS |
|          |            |         | GG | 229(49.7) | 248(53.3) |       | NS |
|          | rs17231506 | 0.17(T) | CC | 319(69.5) | 331(71.2) | 0.578 |    |
|          |            |         | CT | 126(27.5) | 116(24.9) |       | NS |
|          |            |         | TT | 14(3.1)   | 18(3.9)   |       | NS |
| HERPUD1  | rs2133783  | 0.19(G) | AA | 308(66.8) | 298(64.2) | 0.645 |    |
|          |            |         | AG | 134(29.1) | 148(31.9) |       | NS |
|          |            |         | GG | 19(4.1)   | 18(3.9)   |       | NS |
|          | rs2217332  | 0.09(T) | CC | 382(82.9) | 382(82.7) | 0.997 |    |
|          |            |         | CT | 75(16.3)  | 76(16.5)  |       | NS |
|          |            |         | TT | 4(0.9)    | 4(0.9)    |       | NS |
| SERPING1 | rs1005510  | 0.26(G) | AA | 250(54.3) | 256(55.1) | 0.845 |    |
|          |            |         | AG | 178(38.7) | 181(38.9) |       | NS |
|          |            |         | GG | 32(7.0)   | 28(6.0)   |       | NS |
|          | rs2511989  | 0.11(A) | GG | 365(79.2) | 371(80.0) | 0.753 |    |
|          |            |         | GA | 86(18.7)  | 86(18.5)  |       | NS |
|          |            |         | AA | 10(2.2)   | 7(1.5)    |       | NS |
| LPL      | rs12678919 | 0.09(G) | AA | 380(82.8) | 386(82.7) | 0.953 |    |
|          |            |         | AG | 75(16.3)  | 76(16.3)  |       | NS |
|          |            |         | GG | 4(0.9)    | 5(1.1)    |       | NS |
| LIPC     | rs10468017 | 0.16(T) | CC | 325(70.7) | 316(68.4) | 0.746 |    |
|          |            |         | CT | 125(27.2) | 136(29.4) |       | NS |
|          |            |         | TT | 10(2.2)   | 10(2.2)   |       | NS |
| VEGF     | rs833069   | 0.42(G) | AA | 161(34.8) | 155(33.3) | 0.858 |    |
|          |            |         | GA | 222(48.1) | 227(48.7) |       | NS |
|          |            |         | GG | 79(17.1)  | 84(18.0)  |       | NS |
|          | rs3025039  | 0.19(T) | CC | 299(64.7) | 302(65.2) | 0.267 |    |
|          |            |         | CT | 153(33.1) | 143(30.9) |       | NS |
|          |            |         | TT | 10(2.2)   | 18(3.9)   |       | NS |
| TIMP3    | rs9621532  | 0.02(C) | AA | 443(96.1) | 439(94.4) | 0.228 |    |
|          |            |         | AC | 18(3.9)   | 26(5.6)   |       | NS |

<sup>A</sup>P is referred to chi-square test.

<sup>B</sup>Adjusted for age and gender

<sup>C</sup>NS is referred to not significant.

**Table S3. Age and gender adjusted ORs of the selected SNPs with nAMD.**

| SNP              | Dominant         |          | Recessive        |          | Additive         |          |
|------------------|------------------|----------|------------------|----------|------------------|----------|
|                  | <i>OR(95%CI)</i> | <i>P</i> | <i>OR(95%CI)</i> | <i>P</i> | <i>OR(95%CI)</i> | <i>P</i> |
| <i>rs3793917</i> | 2.68(1.91-3.77)  | 1.40E-8  | 3.82(2.83-5.17)  | 2.79E-18 | 2.38(1.95-2.89)  | 4.66E-18 |
| <i>rs1061170</i> | 2.15(1.46-3.17)  | 1.00E-4  | 7.67(0.95-62.21) | 0.056    | 2.12(1.48-3.05)  | 4.84E-5  |
| <i>rs380390</i>  | 2.37(1.61-3.49)  | 1.37E-5  | 7.71(0.95-62.31) | 0.056    | 2.31(1.60-3.34)  | 7.67E-6  |
| <i>rs2736912</i> | 3.84(1.03-14.27) | 0.044    | 2.11(1.47-3.04)  | 5.78E-5  | 2.01(1.44-2.80)  | 3.68E-5  |

**Table S4. Selected models for AMD by GMDR, allowing ten factors in the informative set.**

| <b>No. of factors included</b> | <b>Selected factors in the best model</b>                                                              | <b>Testing balanced accuracy</b> | <b>Sign test (<i>P</i>)</b> | <b>Cross-validation consistency</b> |
|--------------------------------|--------------------------------------------------------------------------------------------------------|----------------------------------|-----------------------------|-------------------------------------|
| 1                              | rs3793917                                                                                              | 0.6427                           | 0.001                       | 10/10                               |
| 2                              | rs3793917, rs1061170                                                                                   | 0.6450                           | 0.001                       | 10/10                               |
| 3                              | rs3793917, rs1061170, rs380390                                                                         | 0.6163                           | 0.001                       | 4/10                                |
| 4                              | rs3793917, rs800292, rs2274700, rs11569562                                                             | 0.6114                           | 0.001                       | 4/10                                |
| 5                              | rs3793917, rs1061170, rs380390, rs2274700, rs11569562                                                  | 0.5991                           | 0.001                       | 5/10                                |
| 6                              | rs3793917, rs2274700, rs11569562, rs3753394, rs2303789, smoking status                                 | 0.5895                           | 0.001                       | 8/10                                |
| 7                              | rs3793917, rs1061170, rs800292, rs2274700, rs11569562, rs2303789, smoking status                       | 0.6108                           | 0.001                       | 7/10                                |
| 8                              | rs3793917, rs1061170, rs800292, rs2274700, rs11569562, rs3753394, rs2303789, smoking status            | 0.6141                           | 0.001                       | 6/10                                |
| 9                              | rs3793917, rs1061170, rs800292, rs2274700, rs11569562, rs3753394, rs2736912, rs2303789, smoking status | 0.6235                           | 0.001                       | 10/10                               |
